# Supplementary material for: Proteomic Characterization of the Venom of Five Bombus (Thoracobombus) Species
Source: PubMed Central journal article supplement (PMC5705977; doi:10.3390/toxins9110362), 2017-11-11
Supplement: toxins-09-00362-s001.pdf [file toxins-09-00362-s001.pdf]

## Supplementary Materials: Proteomic Characterization of the Venom of Five *Bombus* (*Thoracobombus*) Species

Nezahat Pınar Barkan, Mustafa Bilal Bayazit and Duygu Ozel Demiralp

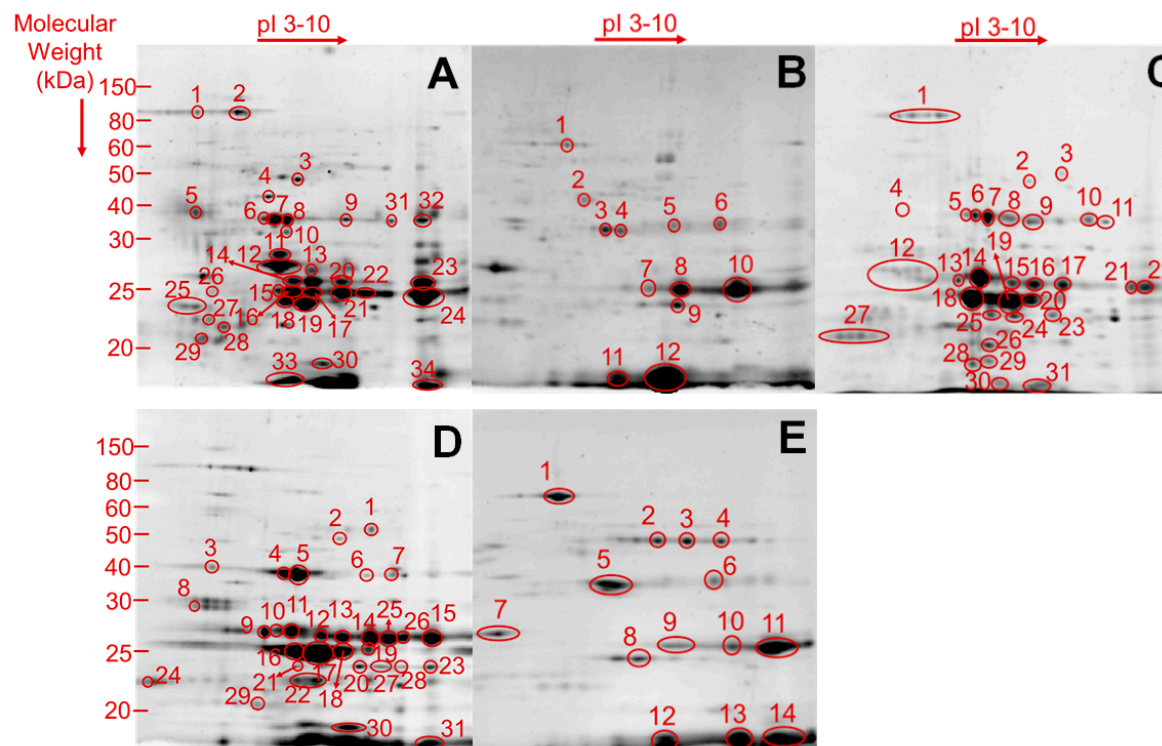

**Figure S1.** 2DE gel images of *Thoracobombus* venom. Representative images of venom profile of (A) *B. humilis*, (B) *B. pascuorum*, (C) *B. ruderarius*, (D) *B. sylvarum*, and (E) *B. zonatus*. Gel analyses were conducted in triplicates. Marked spots are spectrometrically identified (See: Tables S3–S7).

**Table S1.** Sample Collection. Locations, number of specimens, and plants species where the bumble bee species are collected from.

| Species                                                        | Location                                                               | Date       | Altitude (m) | Specimens                         | Foraged plant species                                                                                                                                                                                                                                         |
|----------------------------------------------------------------|------------------------------------------------------------------------|------------|--------------|-----------------------------------|---------------------------------------------------------------------------------------------------------------------------------------------------------------------------------------------------------------------------------------------------------------|
| <i>B. humilis</i>                                              | Ankara-Çerkeş Road, Kızılcahamam-ANKARA<br>40°33.535'K 32°39.026'D     | 02/07/2014 | 1120         | 16                                | <i>Anchusa leptophylla</i> ROEMER ET SCHULTES subsp. <i>incana</i> (LEDEB.)<br>CHAMB., <i>Stachys byzantina</i> C. KOCH                                                                                                                                       |
|                                                                | Ankara-Çerkeş Road, Kızılcahamam-ANKARA<br>40°33.535'K 32°39.026'D     | 17/07/2014 | 1120         | 34                                | <i>Anchusa leptophylla</i> ROEMER ET SCHULTES subsp. <i>incana</i> (LEDEB.)<br>CHAMB., <i>Melilotus officinalis</i> (L.) DESR., <i>Nepeta nuda</i> L. subsp. <i>nuda</i> L.,<br><i>Stachys byzantina</i> C. KOCH, <i>Nepeta nuda</i> L. subsp. <i>nuda</i> L. |
|                                                                | Soğuk Su National Park, Kızılcahamam-ANKARA<br>40°27.113'K 32°37.355'D | 04/07/2014 | 1216         | 15                                | <i>Trifolium</i> sp., <i>Lathyrus incurvus</i> (ROTH.) WILLD.                                                                                                                                                                                                 |
| <i>B. pascuorum</i>                                            | Abant Lake Natural Park-BOLU<br>40°36'K 31°16'D                        | 09/08/2013 | 1350         | 10                                | <i>Carduus nutans</i>                                                                                                                                                                                                                                         |
|                                                                | Soğuk Su National Park, Kızılcahamam-ANKARA<br>40°27.113'K 32°37.355'D | 04/07/2014 | 1216         | 22                                | <i>Trifolium</i> sp., <i>Lathyrus incurvus</i> (ROTH.) WILLD.                                                                                                                                                                                                 |
|                                                                | Ankara-Çerkeş Road, Kızılcahamam-ANKARA<br>40°33.535'K 32°39.026'D     | 02/07/2014 | 1120         | 6                                 | <i>Anchusa leptophylla</i> ROEMER ET SCHULTES subsp. <i>incana</i> (LEDEB.)<br>CHAMB., <i>Melilotus officinalis</i> (L.) DESR., <i>Nepeta nuda</i> L. subsp. <i>nuda</i> L.,<br><i>Stachys byzantina</i> C. KOCH, <i>Nepeta nuda</i> L. subsp. <i>nuda</i> L. |
|                                                                | Ankara-Çerkeş Road, Kızılcahamam-ANKARA<br>40°33.535'K 32°39.026'D     | 17/07/2014 | 1120         | 3                                 | <i>Anchusa leptophylla</i> ROEMER ET SCHULTES subsp. <i>incana</i> (LEDEB.)<br>CHAMB., <i>Melilotus officinalis</i> (L.) DESR., <i>Nepeta nuda</i> L. subsp. <i>nuda</i> L.,<br><i>Stachys byzantina</i> C. KOCH,                                             |
|                                                                | Ilgaz Mountain National Park-ÇANKIRI<br>41°4.306'K 33°43.815'D         | 19/07/2014 | 1857         | 19                                | <i>Allium</i> sp., <i>Trifolium</i> sp.                                                                                                                                                                                                                       |
| Ilgaz Mountain National Park-ÇANKIRI<br>41°4.306'K 33°43.815'D | 30/08/2014                                                             | 1857       | 7            | <i>Epilobium angustifolium</i> L. |                                                                                                                                                                                                                                                               |
| <i>B. ruderarius</i>                                           | Erciyes Mountain-KAYSERİ<br>38°32.807'K 35°31.427'D                    | 28/07/2014 | 2177         | 35                                | <i>Carduus</i> sp.                                                                                                                                                                                                                                            |
| <i>B. sylvarum</i>                                             | Erciyes Mountain-KAYSERİ<br>38°32.807'K 35°31.427'D                    | 28/07/2014 | 2177         | 43                                | <i>Carduus</i> sp.                                                                                                                                                                                                                                            |
| <i>B. zonatus</i>                                              | H. U. Beytepe Campus, ANKARA<br>39°52.321'K 32°44.168'D                | 24/07/2014 | 1038         | 23                                | <i>Syringia</i> sp.                                                                                                                                                                                                                                           |
|                                                                | Ankara-Çerkeş Road, Kızılcahamam-ANKARA<br>40°20.442'K 32°41.731'D     | 02/07/2014 | 991          | 2                                 | <i>Salvia candidissima</i> VAHL subsp. <i>candidissima</i> VAHL.                                                                                                                                                                                              |
|                                                                | H. U. Beytepe Campus, ANKARA<br>39°52.265'K 32°43.844'D                | 14/07/2014 | 1017         | 4                                 | <i>Consolida regalis</i> S. F. GRAY subsp. <i>paniculata</i> (HOST) SOO var. <i>paniculata</i><br>(HOST) SOO                                                                                                                                                  |

**Table S2.** Common and differentially expressed protein spots in *Thoracobombus venom*. Spots intensities are compared in *B. humilis*, *B. pascuorum*, *B. ruderarius*, *B. sylvarum*, and *B. zonatus* venom.

| Species                           | Number of common protein spots | Number of differentially expressed protein spots ( $p < 0.05$ ) |
|-----------------------------------|--------------------------------|-----------------------------------------------------------------|
| <i>B. humilis/B. pascuorum</i>    | 56                             | 15                                                              |
| <i>B. humilis/B. sylvarum</i>     | 67                             | 19                                                              |
| <i>B. humilis/B. ruderarius</i>   | 66                             | 22                                                              |
| <i>B. humilis/B. zonatus</i>      | 45                             | 23                                                              |
| <i>B. pascuorum/B. sylvarum</i>   | 48                             | 14                                                              |
| <i>B. pascuorum/B. ruderarius</i> | 46                             | 21                                                              |
| <i>B. pascuorum/B. zonatus</i>    | 31                             | 16                                                              |
| <i>B. sylvarum/B. ruderarius</i>  | 61                             | 19                                                              |
| <i>B. sylvarum/B. zonatus</i>     | 46                             | 18                                                              |
| <i>B. ruderarius/B. zonatus</i>   | 44                             | 19                                                              |

Table S3. List of identified proteins in *B. humilis* venom.

| Spot # | Access #     | Identified protein                                                   | Score | Theoretical pI/Mw (kDa) | Observed pI/Mw (kDa) | Sequence coverage (%) | Matched/unmatched peptides |
|--------|--------------|----------------------------------------------------------------------|-------|-------------------------|----------------------|-----------------------|----------------------------|
| 1      | XP_013164724 | Neurexin-4 isoform X2                                                | 55    | 5.83/144.4              | 5.63/153.32          | 8                     | 9/1                        |
| 2      | Q10737       | Aminopeptidase N                                                     | 37    | 6.47/111.2              | 6.26/151.29          | 8                     | 7/2                        |
| 2      | Q01202       | Paramyosin                                                           | 20    | 5.80/101.9              | 6.26/151.29          | 7                     | 5/3                        |
| 3      | XP_003694643 | Malate dehydrogenase, cytoplasmic                                    | 45    | 6.92/35.9               | 7.27/56.08           | 19                    | 5/5                        |
| 4      | EKC41389     | 39S ribosomal protein L47, mitochondrial                             | 40    | 9.55/47.9               | 6.78/49.48           | 17                    | 6/3                        |
| 5      | XP_008477265 | Mitotic checkpoint serine/threonine-protein kinase BUB1-like         | 56    | 8.71/35.3               | 5.64/45.78           | 23                    | 7/5                        |
| 6      | XP_003486583 | Venom acid phosphatase Acph-1-like isoform X3                        | 96    | 6.84/46.9               | 6.86/42.39           | 18                    | 8/5                        |
| 7      | XP_003486583 | Venom acid phosphatase Acph-1-like isoform X3                        | 99    | 6.84/46.9               | 6.88/42.39           | 17                    | 8/4                        |
| 8      | XP_003486583 | Venom acid phosphatase Acph-1-like isoform X3                        | 95    | 6.84/46.9               | 6.90/42.38           | 16                    | 8/5                        |
| 9      | P85841       | Hyaluronidase 1 (Fragment)                                           | 43    | 8.75/45.2               | 6.82/42.37           | 10                    | 3/5                        |
| 10     | XP_011559125 | L-lactate dehydrogenase isoform X2                                   | 62    | 6.45/37.6               | 6.86/42.39           | 21                    | 7/3                        |
| 11     | XP_011184077 | Tropomyosin-1, isoforms 33/34 isoform X26                            | 62    | 4.74/32.7               | 6.95/33.79           | 27                    | 7/1                        |
| 11     | LOC100118569 | phytanoyl-CoA dioxygenase, peroxisomal-like                          | 44    | 5.95/32.6               | 6.95/33.79           | 20                    | 4/1                        |
| 12     | LOC102680781 | TNF receptor-associated factor 4-like                                | 54    | 8.33/42.5               | 6.95/31.21           | 19                    | 7/4                        |
| 13     | XP_005187259 | NADH dehydrogenase [ubiquinone] iron-sulfur protein 3, mitochondrial | 43    | 6.97/30                 | 7.51/30.74           | 13                    | 4/1                        |
| 13     | XP_005175580 | Alpha-tocopherol transfer protein-like                               | 52    | 5.97/20.5               | 7.51/30.74           | 18                    | 4/1                        |
| 14     | P00630       | Phospholipase A2                                                     | 35    | 7.05/19.6               | 7.18/28.42           | 13                    | 5/9                        |
| 15     | P43689       | Tropomyosin-2                                                        | 49    | 4.58/32.6               | 7.04/24.78           | 26                    | 6/5                        |
| 16     | P14208       | Arginine kinase                                                      | 32    | 6.05/40.3               | 7.2/26.36            | 28                    | 8/14                       |
| 17     | Q7M4I3       | Venom protease                                                       | 23    | 8.85/27.6               | 7.53/26.58           | 23                    | 3/7                        |
| 18     | P00630       | Phospholipase A2                                                     | 29    | 7.05/19.6               | 7.2/26.36            | 29                    | 5/17                       |
| 19     | P00630       | Phospholipase A2                                                     | 40    | 7.05/19.6               | 7.18/28.42           | 13                    | 5/9                        |
| 20     | Q9U9J4       | Arginine kinase                                                      | 44    | 6.39/40.5               | 7.99/28.25           | 32                    | 9/11                       |

|    |              |                                                    |    |            |            |    |      |
|----|--------------|----------------------------------------------------|----|------------|------------|----|------|
| 21 | KHJ85713     | Triose-phosphate isomerase                         | 53 | 8.18/27.6  | 7.99/28.25 | 31 | 8/13 |
| 22 | Q9U9J4       | Arginine kinase                                    | 44 | 6.39/40.5  | 7.99/28.25 | 13 | 3/7  |
| 23 | P00630       | Phospholipase A2                                   | 22 | 7.05/19.6  | 9.40/28.20 | 15 | 5/7  |
| 23 | XP_013096194 | Centrosomal protein of 290 kDa-like                | 56 | 9.04/27.7  | 9.40/28.20 | 34 | 7/5  |
| 23 | XP_011493908 | Cyclin-dependent kinase inhibitor 1C-like          | 44 | 11.15/28.9 | 9.40/28.20 | 31 | 5/7  |
| 23 | XP_012525274 | Phosphoserine phosphatase isoform X1               | 37 | 8.26/28    | 9.87/25.84 | 31 | 5/9  |
| 24 | P00630       | Phospholipase A2                                   | 42 | 7.05/19.6  | 9.87/25.84 | 14 | 2/2  |
| 25 | XP_013309262 | Ankyrin repeat protein                             | 66 | 5.30/28.2  | 5.44/25.16 | 32 | 7/4  |
| 25 | XP_013147109 | Adenylate kinase isoenzyme 1 isoform X2            | 42 | 6.64/25.8  | 5.44/25.16 | 23 | 5/6  |
| 26 | AJO64864     | Arginine kinase, partial                           | 40 | 6.78/22.7  | 5.88/27.80 | 26 | 5/6  |
| 27 | XP_014236257 | Ribose-5-phosphate isomerase                       | 40 | 5.96/25.9  | 5.7/22.9   | 25 | 5/6  |
| 28 | AGB85951     | Triosephosphate isomerase, partial                 | 66 | 5.07/15.9  | 6.08/21.7  | 36 | 7/7  |
| 29 | XP_011191994 | Peroxioredoxin-6-like                              | 42 | 6.30/25.4  | 5.8/20.03  | 21 | 4/2  |
| 30 | P48816       | Lysozyme                                           | 34 | 8.99/16.1  | 7.65/16.53 | 29 | 4/6  |
| 30 | XP_013144263 | probable maleylacetoacetate isomerase 1, partial   | 52 | 8.57/25.3  | 7.65/16.53 | 25 | 6/4  |
| 31 | CEF63756     | 3-hydroxyacyl-CoA dehydrogenase, C-terminal domain | 45 | 9.05/50.1  | 8.84/42.25 | 16 | 7/4  |
| 31 | XP_011639815 | Bystin                                             | 50 | 8.63/50.4  | 8.84/42.25 | 17 | 8/3  |
| 32 | O76756       | 40S ribosomal protein S8                           | 37 | 10.58/24.1 | 9.89/42.70 | 31 | 5/7  |
| 32 | P00630       | Phospholipase A2                                   | 35 | 7.05/19.6  | 9.89/42.70 | 11 | 4/8  |
| 33 | XP_012798920 | 25 kDa integral membrane protein                   | 61 | 8.47/15.5  | 7.45/15.21 | 39 | 5/3  |
| 34 | Q56FG8       | 60S ribosomal protein L18                          | 37 | 11.45/21.8 | 9.88/15.52 | 21 | 4    |

Table S4. List of identified proteins in *B. pascuorum* venom.

| Spot # | Access #     | Identified protein                                           | Score | Theoretical pI/Mw (kDa) | Observed pI/Mw (kDa) | Sequence coverage (%) | Matched/ unmatched peptides |
|--------|--------------|--------------------------------------------------------------|-------|-------------------------|----------------------|-----------------------|-----------------------------|
| 1      | WP_022965612 | nitrogen regulation protein NR(I)                            | 80    | 5.56/20                 | 6.26/151.29          | 20                    | 10/3                        |
| 2      | XP_005077830 | PREDICTED: kelch-like protein 25                             | 79    | 6.27/66.8               | 6.78/49.48           | 28                    | 13/6                        |
| 2      | P21879       | Inosine-5'-monophosphate dehydrogenase                       | 50    | 6.18/53.1               | 6.78/49.48           | 26                    | 10/9                        |
| 2      | Q8Z2E5       | L-lactate dehydrogenase                                      | 34    | 6.25/42.9               | 6.78/49.48           | 15                    | 4/4                         |
| 3      | XP_003486583 | Venom acid phosphatase AcpH-1-like isoform X3                | 88    | 6.84/46.9               | 6.86/42.39           | 18                    | 8/5                         |
| 4      | XP_003486583 | Venom acid phosphatase AcpH-1-like isoform X3                | 80    | 6.84/46.9               | 6.92/42.38           | 18                    | 8/5                         |
| 5      | Q8LPJ5       | Isocitrate dehydrogenase [NADP], chloroplastic/mitochondrial | 50    | 8.05/54.5               | 7.09/42.37           | 15                    | 7/4                         |
| 5      | WP_034695000 | transporter                                                  | 63    | 6.08/46.8               | 7.09/42.37           | 28                    | 9/7                         |
| 5      | WP_023383864 | peptide ABC transporter ATP-binding protein                  | 64    | 9.01/37.4               | 7.09/42.37           | 34                    | 9/8                         |
| 5      | P49597       | Protein phosphatase 2C 56                                    | 38    | 5.81/47.9               | 7.09/42.37           | 13                    | 5/3                         |
| 5      | Q8IY84       | Serine/threonine-protein kinase NIM1                         | 59    | 8.53/49.9               | 7.09/42.37           | 20                    | 6/2                         |
| 5      | Q9ZKU5       | Acetate kinase                                               | 48    | 6.47/44.9               | 7.09/42.37           | 22                    | 7/10                        |
| 6      | P85841       | Hyaluronidase 1 (Fragment)                                   | 62    | 8.75/45.2               | 8.84/42.25           | 24                    | 6/5                         |
| 7      | Q9U9J4       | Arginine kinase                                              | 36    | 6.39/40.5               | 7.2/26.36            | 20                    | 6/4                         |

|    |          |                                               |    |           |            |    |      |
|----|----------|-----------------------------------------------|----|-----------|------------|----|------|
| 8  | Q7M4I3   | Venom protease                                | 40 | 8.85/27.6 | 7.62/26.58 | 23 | 6/4  |
| 9  | Q6VU70   | Apolipoprotein-3                              | 23 | 8.71/20.7 | 7.88/24.25 | 24 | 3/8  |
| 9  | BAH86593 | farnesoic acid O-methyltransferase            | 60 | 5.86/31.1 | 7.88/24.25 | 23 | 6/4  |
| 10 | P00630   | Phospholipase A2                              | 20 | 7.05/19.6 | 9.88/25.84 | 17 | 5/6  |
| 11 | P55948   | Metallothionein                               | 20 | 8.07/7.2  | 7.07/15.44 | 37 | 2/9  |
| 11 | P31824   | Acyl-CoA-binding protein homolog              | 19 | 6.56/9.7  | 7.07/15.44 | 34 | 2/9  |
| 12 | P55928   | Potassium channel toxin alpha-KTx 7.2         | 21 | 9.24/4.4  | 7.45/15.21 | 77 | 2/13 |
| 12 | O96669   | Putative potassium channel blocker (Fragment) | 20 | 8.68/5.7  | 7.07/15.44 | 31 | 2/13 |
| 12 | Q10745   | Defensin                                      | 21 | 8.70/4.8  | 7.07/15.44 | 58 | 2/13 |
| 12 | P41965   | 4 kDa defensin                                | 25 | 9.69/4.6  | 7.07/15.44 | 42 | 2/11 |
| 12 | B8XH50   | Amphipathic peptide Tx348                     | 21 | 9.16/7.7  | 7.07/15.44 | 25 | 2/11 |
| 12 | Q6JQN2   | Peptide BmKn2                                 | 21 | 9.10/7.9  | 7.07/15.44 | 24 | 2/11 |
| 12 | E4VP07   | Venom antimicrobial peptide-6                 | 21 | 9.10/7.9  | 7.07/15.44 | 24 | 2/11 |

Table S5. List of identified proteins in *B. ruderarius* venom.

| Spot # | Access #     | Identified protein                                                    | Score | Theoretical pI/Mw (kDa) | Observed pI/Mw (kDa) | Sequence coverage (%) | Matched/ unmatched peptides |
|--------|--------------|-----------------------------------------------------------------------|-------|-------------------------|----------------------|-----------------------|-----------------------------|
| 1      | CEF69244     | Globin, structural domain and GPCR, 7TM domain-containing protein     | 40    | 9.42/69.3               | 5.55/136.11          | 14                    | 8/8                         |
| 1      | XP_001602327 | PREDICTED: DNA mismatch repair protein Mlh1                           | 52    | 6.79/80.8               | 5.55/136.11          | 16                    | 9/4                         |
| 2      | KPJ17530     | Serine protease snake                                                 | 60    | 9.02/38.7               | 6.99/56.53           | 20                    | 9/5                         |
| 2      | P29190       | Phosphoenolpyruvate carboxykinase [GTP]                               | 31    | 6.86/70.2               | 6.99/56.53           | 11                    | 5/2                         |
| 3      | Q622Z7       | G protein-coupled receptor kinase 1                                   | 32    | 8.31/74.2               | 7.21/56.71           | 9                     | 5/2                         |
| 3      | H9IWW7       | Inactive peptidyl-prolyl cis-trans isomerase shutdown                 | 33    | 5.84/49.6               | 7.21/56.71           | 13                    | 4/3                         |
| 3      | CDS26201     | t complex protein 11 protein 1                                        | 55    | 5.30/64.4               | 7.21/56.71           | 15                    | 8/3                         |
| 4      | XP_011139073 | PREDICTED: glutathione synthetase-like                                | 52    | 8.03/54.9               | 5.54/42.25           | 15                    | 6/1                         |
| 4      | KOC67432     | Integrin-linked protein kinase                                        | 41    | 6.86/51                 | 5.54/42.25           | 14                    | 5/2                         |
| 5      | XP_003486583 | Venom acid phosphatase Acph-1-like isoform X3                         | 96    | 6.84/46.9               | 6.52/42.15           | 16                    | 8/3                         |
| 6      | Q5BLY5       | Venom acid phosphatase Acph-1                                         | 23    | 5.63/45.5               | 6.8/41.76            | 7                     | 3/3                         |
| 7      | XP_013390249 | PREDICTED: methylmalonic aciduria type A homolog                      | 75    | 8.79/48.1               | 6.7/41.39            | 25                    | 10/2                        |
| 7      | KHN81636     | 17-beta-hydroxysteroid dehydrogenase type 6                           | 45    | 7.82/38.8               | 6.7/41.39            | 18                    | 5/3                         |
| 7      | XP_011269785 | PREDICT: KH domain-containing...signal trans.-associated pr3-like     | 42    | 8.85/48                 | 6.7/41.39            | 13                    | 5/2                         |
| 8      | P85841       | Hyaluronidase 1 (Fragment)                                            | 50    | 8.75/45.2               | 6.95/41.97           | 18                    | 6/4                         |
| 9      | KHJ42768     | intermediate filament tail domain protein                             | 57    | 6.37/66.3               | 7.17/40.91           | 16                    | 9/1                         |
| 9      | XP_003486187 | PREDICT: probable serine/threonine-protein kinase DDB_G0282963        | 48    | 9.71/46.1               | 7.17/40.91           | 17                    | 7/3                         |
| 9      | KMQ86823     | dna primase small subunit                                             | 42    | 7.56/49.3               | 7.17/40.91           | 16                    | 7/3                         |
| 10     | XP_013294625 | peptidase dimerization domain protein                                 | 62    | 6.04/48.3               | 8.51/41.61           | 20                    | 6/0                         |
| 10     | CDJ84573     | PAK-box P21-Rho-bind / Ser/thr protein kin.-related dom containing... | 42    | 7.59/65.8               | 8.51/41.61           | 13                    | 5/1                         |
| 10     | XP_001120785 | PREDICT: zinc finger protein 704-like isoform X1                      | 41    | 8.45/63.8               | 8.51/41.61           | 13                    | 5/1                         |
| 10     | XP_012252555 | PREDICT: uncharacterized aarF domain-containing protein kinase 1      | 61    | 9.09/60                 | 8.51/41.61           | 17                    | 7/2                         |

|    |              |                                                          |    |           |            |    |      |
|----|--------------|----------------------------------------------------------|----|-----------|------------|----|------|
| 11 | XP_013091290 | PREDICT: cysteine and histidine-rich protein 1-like      | 43 | 6.50/40.5 | 9.01/40.80 | 14 | 5/2  |
| 12 | P22311       | Puff II/9-1 protein                                      | 38 | 5.27/33   | 5.56/30.42 | 22 | 5/5  |
| 13 | P14208       | Arginine kinase                                          | 32 | 6.05/40.3 | 7.2/26.36  | 28 | 8/14 |
| 14 | P00630       | Phospholipase A2                                         | 22 | 7.05/19.6 | 6.47/28.76 | 18 | 3/7  |
| 14 | P00357       | Glyceraldehyde-3-phosphate dehydrogenase                 | 36 | 6.53/35.9 | 6.63/28.19 | 19 | 5/5  |
| 14 | P56839       | Phosphoenolpyruvate phosphomutase                        | 24 | 5.51/33   | 6.63/28.19 | 15 | 4/6  |
| 15 | P00630       | Phospholipase A2                                         | 19 | 7.05/19.6 | 7.23/31.07 | 10 | 2/3  |
| 15 | Q5TXB2       | Structure-specific endonuclease subunit SLX1 homolog     | 24 | 5.76/32   | 7.23/31.07 | 12 | 3/2  |
| 16 | P14208       | Arginine kinase                                          | 37 | 6.05/40.3 | 7.78/31.06 | 20 | 9/12 |
| 16 | Q27775       | Triosephosphate isomerase                                | 24 | 6.66/28   | 7.78/31.06 | 17 | 3/5  |
| 17 | XP_002409028 | tyrosine kinase, putative                                | 54 | 6.05/43.9 | 8.52/31.06 | 16 | 5/0  |
| 17 | XP_004535104 | PREDICTED: dehydrogenase/reductase SDR family member 11  | 43 | 8.72/28.1 | 8.52/31.06 | 19 | 4/1  |
| 17 | CDJ81617     | dephospho-CoA kinase                                     | 43 | 8.92/26.7 | 8.52/31.06 | 21 | 4/1  |
| 17 | P00630       | Phospholipase A2                                         | 17 | 7.05/19.6 | 8.52/31.06 | 7  | 2/3  |
| 18 | XP_013395969 | PREDICTED: cytochrome P450 2D14-like                     | 44 | 6.10/24.4 | 6.47/26.41 | 27 | 5/6  |
| 18 | XP_013409932 | PREDICTED: WD repeat-containing protein 92-like, partial | 45 | 6.64/25.6 | 6.47/26.41 | 20 | 4/3  |
| 18 | KFM60472     | Transposable element Tcb1 transposase, partial           | 41 | 7.68/23.6 | 6.47/26.41 | 20 | 5/2  |
| 18 | P00630       | Phospholipase A2                                         | 16 | 7.05/19.6 | 6.47/26.41 | 10 | 2/5  |
| 18 | A8Y461       | Enolase-phosphatase E1                                   | 18 | 5.38/28.2 | 6.47/26.41 | 6  | 2/4  |
| 19 | Q7M4I3       | Venom protease                                           | 33 | 8.85/27.6 | 7.17/25.96 | 22 | 4/3  |
| 20 | Q61D43       | Mediator of RNA polymerase II transcription subunit 18   | 33 | 9.15/26.1 | 8.20/25.97 | 23 | 7/14 |
| 20 | XP_003386765 | PREDICTED: glutathione S-transferase-like                | 43 | 6.23/23.2 | 8.20/25.97 | 36 | 7/9  |
| 20 | XP_005190650 | PREDICTED: glutaredoxin 3                                | 74 | 4.83/23.5 | 8.20/25.97 | 38 | 6/2  |
| 21 | P00630       | Phospholipase A2                                         | 21 | 7.05/19.6 | 9.20/25.97 | 13 | 3/7  |
| 21 | P00630       | Phospholipase A2                                         | 24 | 7.05/19.6 | 9.20/25.97 | 12 | 3/2  |
| 22 | AKS40350     | glutathione S-transferase theta 1 [Chilo suppressalis]   | 47 | 8.85/26.6 | 9.39/29.43 | 26 | 6/4  |
| 23 | P00630       | Phospholipase A2                                         | 37 | 7.05/19.6 | 8.41/25.96 | 20 | 4/3  |
| 23 | P10737       | Venom allergen 5.02 (Fragment)                           | 17 | 9.13/24.7 | 8.41/25.96 | 13 | 2/4  |
| 24 | EFN83275     | Inositol monophosphatase                                 | 63 | 5.42/28.8 | 7.18/25.90 | 21 | 6/2  |
| 25 | XP_011298725 | PREDICTED: FK506-binding protein 2 isoform X1            | 54 | 4.67/24.6 | 6.90/25.92 | 26 | 6/5  |
| 26 | A8XHX1       | Tetratricopeptide repeat protein 36 homolog              | 20 | 5.26/19.8 | 6.88/24.85 | 22 | 3/11 |
| 26 | Q16981       | Neuronal calcium sensor 1                                | 20 | 4.78/22.2 | 6.88/24.85 | 21 | 3/8  |
| 27 | AGB86884     | proteasome subunit, partial                              | 42 | 4.42/19.6 | 4.22/24.90 | 24 | 4/4  |
| 28 | E7CLP0       | Putative alpha-neurotoxin RjAa9 (Fragment)               | 26 | 8.15/7.6  | 6.48/21.42 | 19 | 2/3  |
| 29 | P86403       | Neurotoxin MeuNaTx-2                                     | 23 | 8.19/7.6  | 6.85/21.45 | 21 | 2/6  |
| 30 | KMQ93222     | protein phosphatase 11-like protein, partial             | 55 | 5.63/12   | 6.87/18.72 | 55 | 5/6  |
| 31 | KMQ93222     | protein phosphatase 11-like protein, partial             | 74 | 5.63/12   | 7.78/18.70 | 55 | 5/1  |

Table S6. List of identified proteins in *B. sylvorum* venom.

| Spot # | Access #     | Identified protein                                                   | Score | Theoretical pI/Mw (kDa) | Observed pI/Mw (kDa) | Sequence coverage (%) | Matched/unmatched peptides |
|--------|--------------|----------------------------------------------------------------------|-------|-------------------------|----------------------|-----------------------|----------------------------|
| 1      | CDJ88047     | Dehydrogenase domain containing protein                              | 42    | 6.08/48.3               | 8.1/63.38            | 10                    | 4/7                        |
| 1      | XP_013391792 | PREDICTED: uncharacterized protein LOC106159893                      | 33    | 8.70/64                 | 8.1/63.38            | 9                     | 4/7                        |
| 2      | KPJ17530     | Serine protease snake                                                | 30    | 9.02/38.7               | 7.27/56.08           | 9                     | 3/7                        |
| 2      | XP_013081819 | PREDICT: MAP kinase kinase kinase 1-like isoform X1                  | 30    | 5.48/42.1               | 7.27/56.08           | 9                     | 3/7                        |
| 3      | CAX82492     | Malate dehydrogenase                                                 | 31    | 7.59/42                 | 5.64/45.78           | 12                    | 3/8                        |
| 4      | XP_003486583 | Venom acid phosphatase AcpH-1-like isoform X3                        | 96    | 5.33/46.2               | 6.86/42.39           | 10                    | 9/4                        |
| 5      | XP_003486583 | PREDICTED: venom acid phosphatase AcpH-1-like isoform X3             | 86    | 6.84/46.9               | 7.52/42.64           | 18                    | 9/15                       |
| 6      | P85841       | Hyaluronidase 1 (Fragment)                                           | 55    | 8.75/45.2               | 8.06/42.37           | 10                    | 3/5                        |
| 7      | EJW83419     | hypothetical protein WUBG_05671                                      | 67    | 5.41/42.3               | 8.84/42.25           | 20                    | 6/4                        |
| 8      | EGT37222     | hypothetical protein CAEBREN_12699                                   | 50    | 6.65/40.2               | 5.33/30.08           | 20                    | 6/3                        |
| 9      | P86699       | Arginine kinase (Fragments)                                          | 19    | 7.74/25.4               | 6.66/27.01           | 6                     | 2/12                       |
| 10     | XP_011873210 | PREDICT: isochorismatase domain-containing pr. 2, mitochondrial-like | 47    | 6.30/21.7               | 6.66/27.01           | 29                    | 4/12                       |
| 10     | P86699       | Arginine kinase (Fragments)                                          | 19    | 7.74/25.4               | 6.66/27.01           | 6                     | 2/12                       |
| 11     | EFN72991     | FAD synthetase                                                       | 32    | 8.67/34.2               | 6.97/26.55           | 15                    | 3/10                       |
| 11     | XP_011563998 | PREDICTED: peroxisome biogenesis factor 10                           | 33    | 8.23/30.8               | 6.97/26.55           | 17                    | 3/10                       |
| 12     | Q7M4I3       | Venom protease                                                       | 33    | 8.85/27.6               | 7.45/26.02           | 25                    | 3/6                        |
| 13     | KHN71023     | Aspartyl protease inhibitor, partial                                 | 61    | 8.62/20.9               | 7.97/26.07           | 30                    | 5/12                       |
| 13     | P30114       | Glutathione S-transferase class-mu 28 kDa isozyme                    | 17    | 6.56/24                 | 7.97/26.07           | 13                    | 2/18                       |
| 13     | P39673       | Allergen Mag (Fragment)                                              | 23    | 6.92/39.6               | 7.97/26.07           | 11                    | 3/12                       |
| 14     | Q1EIQ3       | Peptidase 1                                                          | 33    | 6.95/36.6               | 8.36/26.1            | 26                    | 6/14                       |
| 15     | XP_011142752 | PREDICTED: serine/threonine-protein kinase ICK isoform X2            | 65    | 9.34/66.2               | 9.89/25.84           | 20                    | 7/11                       |
| 15     | P00630       | Phospholipase A2                                                     | 28    | 7.05/19.6               | 9.89/25.84           | 16                    | 3/13                       |
| 16     | P00630       | Phospholipase A2                                                     | 31    | 7.05/19.6               | 7.04/24.78           | 25                    | 5/10                       |
| 17     | P00630       | Phospholipase A2                                                     | 35    | 7.05/19.6               | 7.39/24.65           | 27                    | 4/8                        |
| 17     | ACD01564     | Dopa decarboxylase, partial                                          | 63    | 9.05/21.7               | 7.39/24.65           | 32                    | 6/4                        |
| 17     | P00630       | Phospholipase A2                                                     | 35    | 7.05/19.6               | 7.39/24.65           | 31                    | 5/10                       |
| 18     | P46419       | Glutathione S-transferase                                            | 20    | 6.32/25.8               | 7.88/24.25           | 21                    | 3/7                        |
| 19     | P00630       | Phospholipase A2                                                     | 21    | 7.05/19.6               | 8.34/24.77           | 15                    | 3/6                        |
| 19     | XP_011564135 | PREDICTED: transcription factor Sox-14                               | 52    | 9.94/25.5               | 8.34/24.77           | 35                    | 6/2                        |
| 20     | D2Y2Q2       | Kunitz-type serine protease inhibitor hainantoxin-XI-13              | 27    | 9.36/10.1               | 8.21/22.04           | 36                    | 3/8                        |
| 20     | P00630       | Phospholipase A2                                                     | 20    | 7.05/19.6               | 8.21/22.04           | 9                     | 3/8                        |
| 21     | Q5MGE6       | Defense protein 3                                                    | 22    | 5.75/25                 | 6.8/22.67            | 22                    | 3/8                        |
| 22     | XP_011666262 | PREDICTED: ankyrin-1-like                                            | 50    | 5.94/33                 | 7.02/21.36           | 34                    | 7/6                        |
| 23     | Q3YAU5       | Phospholipase A2 large subunit (Fragment)                            | 18    | 7.46/11.9               | 9.89/22.02           | 29                    | 2/8                        |
| 24     | Q8T6C4       | Thioredoxin peroxidase                                               | 44    | 5.78/21.7               | 4.94/20.63           | 41                    | 5/8                        |
| 25     | Q1EIQ3       | Peptidase 1                                                          | 34    | 6.95/36.6               | 8.74/26.21           | 26                    | 6/12                       |
| 26     | Q9NH49       | Arginine kinase                                                      | 35    | 6.19/40.6               | 9.03/26.14           | 23                    | 6/7                        |
| 27     | KII66870     | Serine/threonine-protein phosphatase 2B catalytic subunit y isoform  | 42    | 9.67/16.4               | 8.38/23.15           | 42                    | 6/11                       |

|    |          |                                                         |    |           |            |    |      |
|----|----------|---------------------------------------------------------|----|-----------|------------|----|------|
| 28 | P51898   | NADH-ubiquinone oxidoreductase chain 4 (Fragment)       | 31 | 8.92/25.1 | 8.51/23.95 | 24 | 4/7  |
| 29 | KFM62790 | Endoribonuclease Dicer, partial                         | 40 | 6.32/20.8 | 5.94/18.19 | 29 | 5/5  |
| 30 | P00630   | Phospholipase A2                                        | 42 | 7.05/19.6 | 7.98/34    | 40 | 5/13 |
| 31 | D2Y2Q2   | Kunitz-type serine protease inhibitor hainantoxin-XI-13 | 67 | 9.36/10.1 | 9.89/15.37 | 27 | 3/4  |

**Table S7.** List of identified proteins in *B. zonatus* venom.

| Spot # | Access #     | Identified protein                                                       | Score | Theoretical pI/Mw (kDa) | Observed pI/Mw (kDa) | Sequence coverage (%) | Matched/unmatched peptides |
|--------|--------------|--------------------------------------------------------------------------|-------|-------------------------|----------------------|-----------------------|----------------------------|
| 1      | A8XFM8       | Lon protease homolog, mitochondrial                                      | 26    | 6.49/107.1              | 6.26/151.29          | 11                    | 8/6                        |
| 2      | EFN76202     | Arginyl-tRNA synthetase, cytoplasmic                                     | 44    | 6.85/78.8               | 7.26/49.41           | 9                     | 6/0                        |
| 2      | XP_011050254 | PREDICTED: putative glycerol kinase 5 isoform X3                         | 55    | 8.71/52.6               | 7.26/49.41           | 14                    | 6/0                        |
| 2      | XP_012150740 | PREDICTED: zinc finger protein 37 homolog isoform X14                    | 42    | 6.15/55                 | 7.26/49.41           | 11                    | 5/1                        |
| 2      | CDW54939     | acyl coenzyme A dehydrogenase, C 4 to                                    | 42    | 8.38/46.8               | 7.26/49.41           | 13                    | 5/1                        |
| 2      | XP_011699966 | PREDICTED: catalase isoform X2                                           | 47    | 8.11/55.7               | 7.26/49.41           | 8                     | 5/1                        |
| 3      | Q17GM7       | Probable citrate synthase 1, mitochondrial                               | 30    | 8.91/51.8               | 7.47/49.21           | 14                    | 5/4                        |
| 3      | XP_012216101 | PREDICTED: ribosomal RNA-processing protein 8                            | 60    | 10.03/55.9              | 7.47/49.21           | 17                    | 8/3                        |
| 4      | P85841       | Hyaluronidase 1 (Fragment)                                               | 55    | 8.75/45.2               | 7.72/49.01           | 19                    | 6/4                        |
| 5      | XP_003486583 | Venom acid phosphatase AcpH-1-like isoform X3                            | 78    | 6.84/46.9               | 6.95/33.79           | 15                    | 3/5                        |
| 6      | Q6R7M4       | Methyl farnesoate epoxidase                                              | 31    | 8.78/56.9               | 7.92/36.36           | 15                    | 8/6                        |
| 7      | XP_011647527 | PREDICTED: caspase-1-like                                                | 40    | 5.48/30.6               | 5.52/29.58           | 26                    | 5/6                        |
| 7      | Q61UX1       | Nascent polypeptide-associated complex subunit alpha                     | 33    | 5.01/22                 | 5.52/29.58           | 34                    | 4/7                        |
| 7      | XP_002433504 | protease m1 zinc metalloprotease, putative                               | 41    | 5.50/26.3               | 5.52/29.58           | 24                    | 4/4                        |
| 7      | O16127       | Tropomyosin A (Fragment)                                                 | 20    | 4.60/32.2               | 5.52/29.58           | 10                    | 3/5                        |
| 8      | XP_008192565 | PREDICTED: 39S ribosomal protein L28, mitochondrial                      | 45    | 9.19/31.9               | 7.97/26.07           | 30                    | 6/6                        |
| 8      | KKA73268     | tRNA synthetase, partial                                                 | 53    | 10.45/27.4              | 7.97/26.07           | 31                    | 6/4                        |
| 9      | Q7M4I3       | Venom protease                                                           | 28    | 8.85/27.6               | 9.89/25.84           | 17                    | 3/4                        |
| 10     | P86699       | Arginine kinase (Fragments)                                              | 38    | 7.74/25.4               | 8.36/26.1            | 33                    | 8/13                       |
| 11     | P00630       | Phospholipase A2                                                         | 20    | 7.05/19.6               | 9.89/25.84           | 13                    | 3/8                        |
| 12     | M1J7U4       | Putative sodium channel alpha-toxin Acra5                                | 28    | 7.64/8.1                | 7.07/15.44           | 46                    | 3/10                       |
| 12     | KFB53291     | Methionine--tRNA ligase                                                  | 59    | 9.34/9.7                | 7.07/15.44           | 53                    | 5/8                        |
| 12     | Q1HPL8       | NADH dehydrogenase [ubiquinone] 1 beta subcomplex subunit 10             | 31    | 5.93/19.2               | 7.07/15.44           | 27                    | 4/9                        |
| 12     | P56219       | Potassium channel toxin alpha-KTx 4.2                                    | 19    | 8.94/6.7                | 7.07/15.44           | 31                    | 2/11                       |
| 13     | CDQ08235     | Protein Bm12574, partial                                                 | 72    | 4.78/6.9                | 7.45/15.21           | 90                    | 6/6                        |
| 13     | P00038       | Cytochrome c                                                             | 23    | 9.50/12                 | 7.45/15.21           | 33                    | 3/9                        |
| 13     | Q8T3S7       | Kunitz-type serine protease inhibitor U1-aranetoxin-Av1a                 | 22    | 9.11/9.6                | 7.45/15.21           | 30                    | 2/4                        |
| 14     | KFM80435     | Coiled-coil-helix-coiled-coil-helix domain-containing protein 7, partial | 50    | 8.84/12.5               | 9.89/15.37           | 44                    | 4/2                        |
| 14     | XP_014253312 | PREDICTED: leucine-rich repeat-containing protein 28 isoform X3          | 79    | 9.11/31.1               | 9.89/15.37           | 29                    | 7/2                        |
